# Supplementary material for: Continuous microfiber drawing by interfacial charge complexation between anionic cellulose nanofibers and cationic chitosan
Source: Royal Society of Chemistry journal article supplement (doi:10.1039/c7ta02467c), 2017-01-01
Supplement: c7ta02467c2.pdf [file c7ta02467c2.pdf]

## Supporting Information

### Continuous microfiber drawing by interfacial charge complexation between anionic cellulose nanofibers and cationic chitosan

Rafael Grande, Eliane Trovatti, Antonio J. F. Carvalho\*, Alessandro Gandini

The supporting information shows the video of the wet drawing process, in which the fiber is pulled from the interface of chitosan and To-CNF. The video also shows the fiber is not formed from the pure chitosan solution or To-CNF suspension.

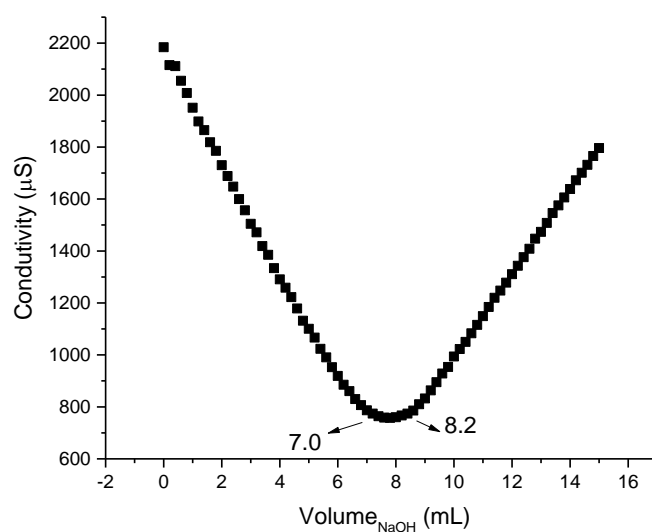

**Figure S1.** Conductimetric curve of To-CNF.

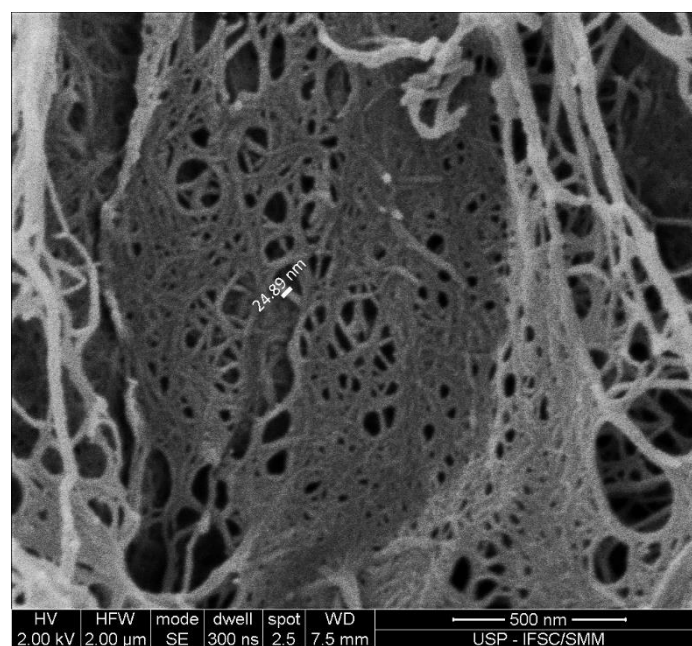

**Figure S2.** SEM image of To-CNF.

**FTIR-ATR spectra from droplets on fibers formation**

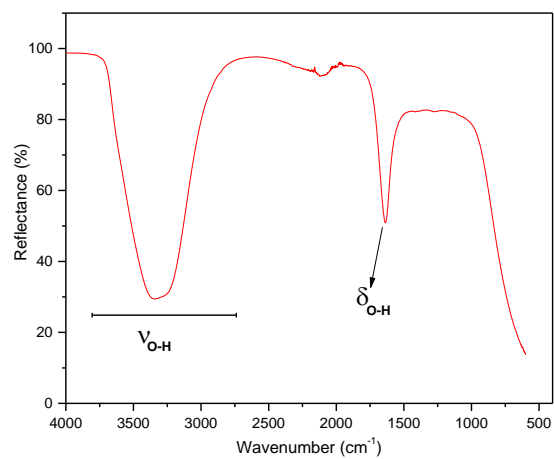

**Figure S3.** FTIR spectra from droplets on fibers formation

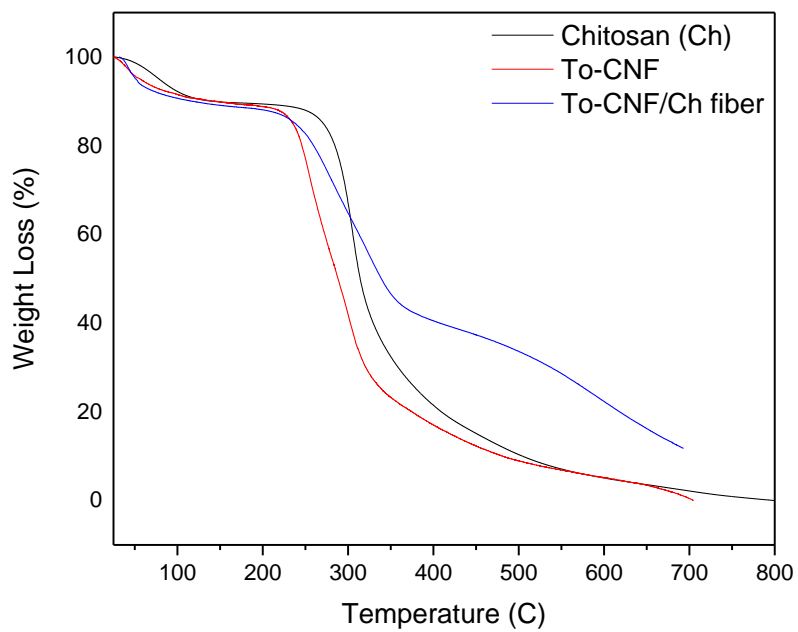

**Figure S4.** TGA curves of neat chitosan, To-CNF and the continuous To-CNF/Chitosan fiber.
